# Supplementary material for: Hydrogen bond-organized two-fold interpenetrating homochiral pcu net
Source: Royal Society of Chemistry journal article supplement (doi:10.1039/c2ce06055h), 2011-12-17
Supplement: c2ce06055h.pdf [file c2ce06055h.pdf]

Supporting Information for

## **Hydrogen bond-organized two-fold interpenetrating homochiral pcu net**

Jing-Yun Wu,<sup>\*a</sup> Sheng-Ming Huang<sup>b</sup> Yun-Chieh Huang<sup>b</sup> and Kuang-Lieh Lu<sup>\*b</sup>

<sup>a</sup>*Department of Applied Chemistry, National Chi Nan University, Nantou 545, Taiwan. Fax:*

*+886-49-2917956; Tel: +886-49-2910960-4918; E-mail: jyunwu@ncnu.edu.tw*

<sup>b</sup>*Institute of Chemistry, Academia Sinica, Taipei 115, Taiwan.*

## Crystal structure determination

Single-crystal X-ray diffraction analysis of **2** was performed by using a Bruker Smart CCD diffractometer equipped with graphite monochromatized Mo K $\alpha$  radiation ( $\lambda = 0.71073 \text{ \AA}$ ). Intensity data were collected at 296(2) K within the limits of  $1.37^\circ \leq \theta \leq 25.05^\circ$ . Starting model for structure refinement was solved by direct methods using SHELXS-97,<sup>S1</sup> and the structural data were refined by full-matrix least-squares methods on  $F^2$  using the WINGX<sup>S2</sup> and SHELX-97<sup>S1</sup> program packages. The molecular structure of **2** was solved in the monoclinic chiral space group  $P2_1$ . The asymmetric unit consists of two copper atoms, two D-H<sub>2</sub>Cam ligands, four 4-ptz ligands, and two coordination water molecules. Anisotropical thermal factors were assigned to most of non-disordered non-hydrogen atoms except those (O4, O4', C26, C27, C32, C24', C26', C31', and C32') showing severe disorder as explained below. Carbon-bound hydrogen atoms were generated geometrically and assigned isotropic thermal parameters. Oxygen-bound hydrogen atoms were structurally evident in difference Fourier maps and refined isotropically in the riding-model approximation with bond length and angles restrains. In **2**, the first crystallographically distinct D-H<sub>2</sub>Cam ligand (C1–C10) has a non-disordered hydrocarbon skeleton, thus it was well-solved in its absolute structure (D-configuration). One of the carboxylic acid oxygens (O4 and O4') of this non-disordered D-H<sub>2</sub>Cam ligand was split over two positions, which were refined isotropically with refined site-occupation factors (SOF) of 0.575 and 0.425. On the other hand, the second crystallographically distinct D-H<sub>2</sub>Cam ligand (C23–C32) was disordered over two occupied sites with refined SOF of 0.65 and 0.35, in which several disordered carbon atoms (C26, C27, and C32 in the major-occupied part, and C24', C26', C31', and C32' in the minor-occupied part) were refined isotropically. Although this D-H<sub>2</sub>Cam ligand is disordered, its absolute structure of D-configuration was determined very well as indicated by the Flack parameter of 0.02(3).<sup>S3</sup> When checking the missing symmetry by the ADDSYM subroutine of PLATON,<sup>S4</sup> an additional (pseudo) symmetry operation of  $c$ -glide is detected; this suggests an alternative space group ( $P2_1/c$ ) assignment. Therefore solving the structure of **2** was further done in the centrosymmetric space group  $P2_1/c$ . Model in  $P2_1/c$  space group contains one copper atom, one H<sub>2</sub>Cam ligand, two 4-ptz ligands, and one coordination water molecule in the asymmetric unit. In the model, structure was refined in mixed isotropic/anisotropic approximation: isotropic for the disordered carbon atoms and anisotropic for the rest non-hydrogen atoms. The H<sub>2</sub>Cam ligand was disordered over two occupied sites with refined SOF of 0.775 and 0.225. Structure refinement showed that the disorder model for the H<sub>2</sub>Cam molecule has had more than disorder of the  $\alpha$ -methyl group at the C1 and C3 atoms. Refinement of the occupancies of the  $\alpha$ -methyl group at C1/C3 gave values of 0.449/0.326 and 0.122/0.103 in the major- and minor-occupied parts, respectively, of the disordered model with reasonable equivalent isotropic displacement parameters. As a result, the ratio of D-/L-configuration or L-/D-configuration of the H<sub>2</sub>Cam ligand is 0.552:0.448 in the final refinement. However, refinement (goodness-of-fit on  $F^2 = 1.118$ , final  $R_1 = 0.0479$  and  $wR_2 = 0.0958 [I > 2\sigma(I)]$ , and  $R_1 = 0.0664$  and  $wR_2 = 0.1052$  (all data)) does not lead to a more reasonable result significantly over than those (goodness-of-fit on  $F^2 = 1.039$ , final  $R_1 = 0.0456$  and  $wR_2 = 0.0932 [I > 2\sigma(I)]$ , and  $R_1 = 0.0739$  and  $wR_2 = 0.1120$  (all data)) in space group  $P2_1$  (Table S1). Further, refinement in the chiral space group  $P2_1$  assigns a reasonable absolute structure parameter (the Flack parameter = 0.02(3))

properly, suggesting a well-solved *D*-configured structure of the H<sub>2</sub>Cam ligand, even though the extreme conditions in the hydrothermal synthesis may induce isomerization of *D*-H<sub>2</sub>Cam ligand. Therefore, on the basis of the refinements, solving the structure of **2** in the chiral space group *P2*<sub>1</sub> is preferred over than in the centrosymmetric space group *P2*<sub>1</sub>/*c*, and the absolute configuration of **2** was determined unambiguously due to the use of the enantiopure *D*-H<sub>2</sub>Cam ligand.

**Table S1** Crystallographic data for **2**

|                                                                         | Non-centrosymmetric model for <b>2</b>                           | Pseudo-centrosymmetric model for <b>2</b>                        |
|-------------------------------------------------------------------------|------------------------------------------------------------------|------------------------------------------------------------------|
| Empirical formula                                                       | C <sub>22</sub> H <sub>26</sub> CuN <sub>10</sub> O <sub>5</sub> | C <sub>22</sub> H <sub>26</sub> CuN <sub>10</sub> O <sub>5</sub> |
| <i>M</i> <sub>w</sub>                                                   | 574.07                                                           | 574.07                                                           |
| Crystal system                                                          | Monoclinic                                                       | Monoclinic                                                       |
| Space group                                                             | <i>P2</i> <sub>1</sub>                                           | <i>P2</i> <sub>1</sub> / <i>c</i>                                |
| <i>a</i> /Å                                                             | 15.262(3)                                                        | 15.262(3)                                                        |
| <i>b</i> /Å                                                             | 13.046(3)                                                        | 13.046(3)                                                        |
| <i>c</i> /Å                                                             | 13.058(3)                                                        | 13.058(3)                                                        |
| <i>α</i> /°                                                             | 90.00                                                            | 90.00                                                            |
| <i>β</i> /°                                                             | 102.54(3)                                                        | 102.54(3)                                                        |
| <i>γ</i> /°                                                             | 90.00                                                            | 90.00                                                            |
| <i>V</i> /Å <sup>3</sup>                                                | 2537.9(9)                                                        | 2537.9(9)                                                        |
| <i>Z</i>                                                                | 4                                                                | 4                                                                |
| <i>T</i> /K                                                             | 296(2)                                                           | 296(2)                                                           |
| <i>λ</i> /Å                                                             | 0.71073                                                          | 0.71073                                                          |
| <i>D</i> <sub>calc</sub> /g cm <sup>-3</sup>                            | 1.502                                                            | 1.502                                                            |
| <i>μ</i> /mm <sup>-1</sup>                                              | 0.915                                                            | 0.915                                                            |
| <i>F</i> <sub>000</sub>                                                 | 1188                                                             | 1188                                                             |
| Refl. collected                                                         | 19536                                                            | 19057                                                            |
| Unique refl. ( <i>R</i> <sub>int</sub> )                                | 8693 (0.0446)                                                    | 4492 (0.0519)                                                    |
| Obs. refl. ( <i>I</i> > 2σ( <i>I</i> ))                                 | 6108                                                             | 3440                                                             |
| Parameters                                                              | 710                                                              | 354                                                              |
| Restraints                                                              | 1                                                                | 3                                                                |
| GOF                                                                     | 1.039                                                            | 1.118                                                            |
| <i>R</i> <sub>1</sub> <sup><i>a</i></sup> ( <i>I</i> > 2σ( <i>I</i> ))  | 0.0456                                                           | 0.479                                                            |
| <i>wR</i> <sub>2</sub> <sup><i>b</i></sup> ( <i>I</i> > 2σ( <i>I</i> )) | 0.0931                                                           | 0.958                                                            |
| <i>R</i> <sub>1</sub> <sup><i>a</i></sup> (all data)                    | 0.0739                                                           | 0.664                                                            |
| <i>wR</i> <sub>2</sub> <sup><i>b</i></sup> (all data)                   | 0.1120                                                           | 0.1052                                                           |
| Δρ <sub>max</sub> , Δρ <sub>min</sub> /e Å <sup>-3</sup>                | 0.395, -0.451                                                    | 0.721, -0.468                                                    |
| Flack parameter                                                         | 0.02(3)                                                          | –                                                                |

$$^a R_1 = \sum \|F_o\| - \|F_c\| / \sum \|F_o\| \cdot ^b wR_2 = \{ \sum [w(F_o^2 - F_c^2)^2] / \sum [w(F_o^2)^2] \}^{1/2}.$$

## References:

- (S1) Sheldrick, G. M. *SHELX-97* (including *SHELXS* and *SHELXL*); University of Göttingen: Göttingen, Germany, 1997.
- (S2) *WINGX*: Farrugia, L. J. *J. Appl. Crystallogr.* **1999**, *32*, 837.
- (S3) Flack, H. D. *Acta Crystallogr., Sect. A: Foundations of Crystallography*, 1983, **39**, 876.
- (S4) Spek, A. L. *J. Appl. Crystallogr.* **2003**, *36*, 7.

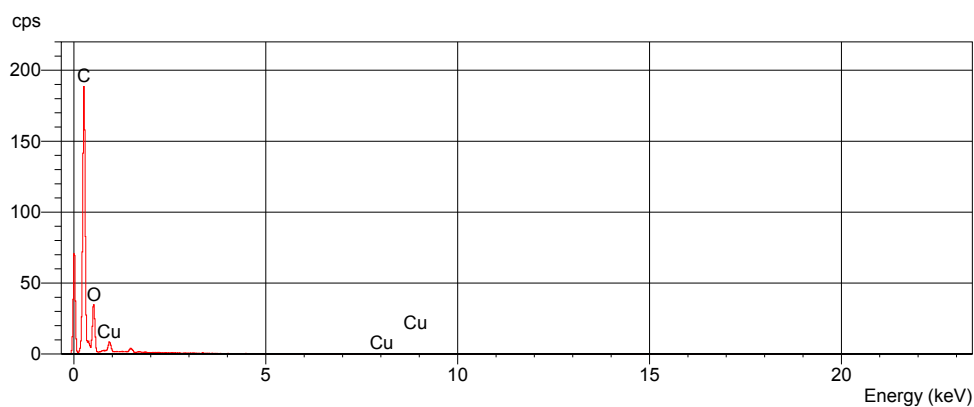

**Fig. S1** Energy-dispersive X-ray (EDX) spectrum of **2**.

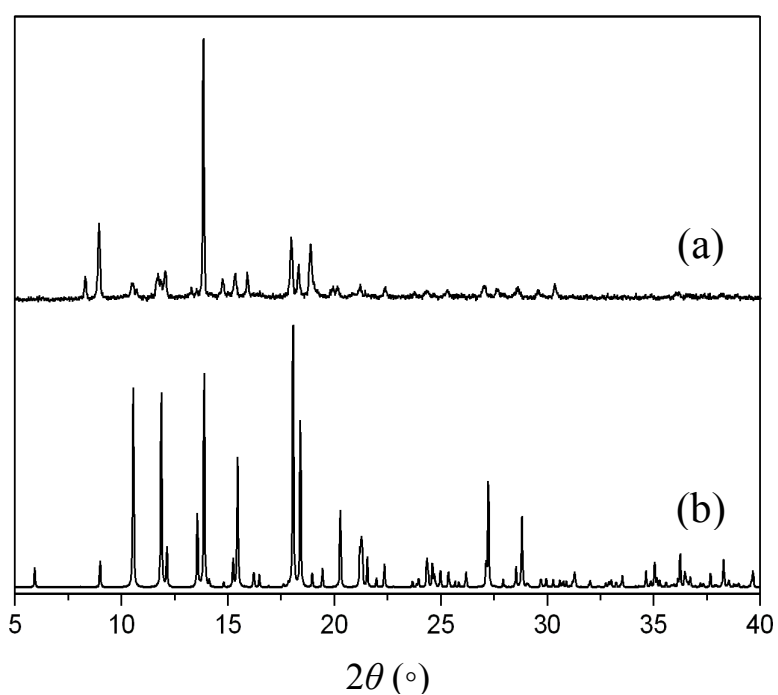

**Fig. S2** Powder X-ray diffraction (PXRD) patterns of **2**: (a) a freshly grounded sample at room temperature; (b) simulated from the single-crystal data.

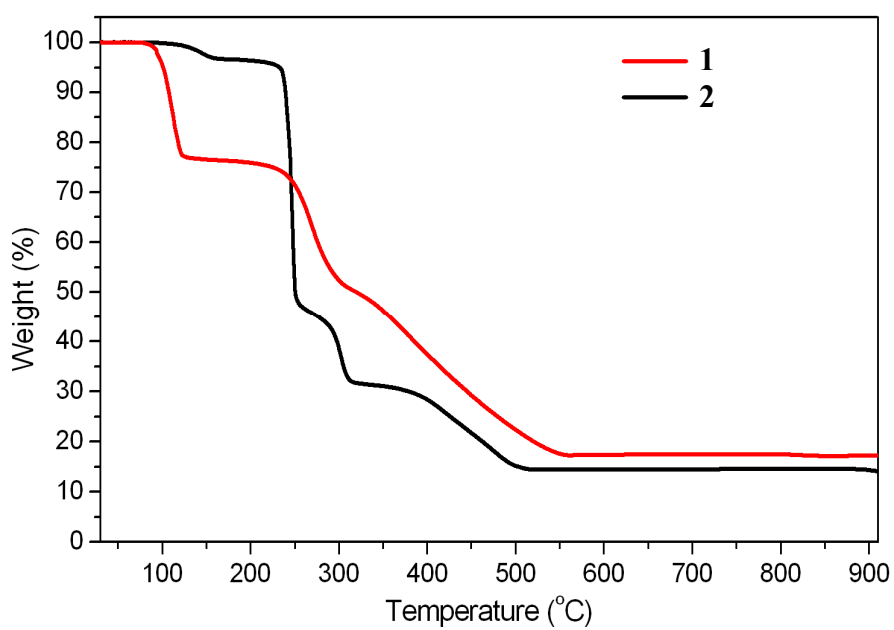

**Fig. S3** Thermogravimetric (TG) traces of **1** and **2**.
